# Supplementary material
Source: Springer Nature journal article supplement (https://www.springermedizin.de/resource/supplementary/12936_2006_331_MOESM1_ESM.pdf/9547566)
Supplement: MOESM1 [file 9547566]

| Site[Article]          | Species                            | Site[Article]  | Species                            | Site[Article]        | Species                                                                     |
|------------------------|------------------------------------|----------------|------------------------------------|----------------------|-----------------------------------------------------------------------------|
| 1[94]                  | <i>An. dirus s.l.</i> <sup>8</sup> | 80-81 [95]     | No specimen                        | 149 [58,95]          | <i>An. dirus s.l.</i> <sup>8</sup>                                          |
| 2 [23]                 | <i>An. elegans</i> <sup>1</sup>    | 82 [95]        | <i>An. dirus s.l.</i> <sup>8</sup> | 150 [95]             | No specimen                                                                 |
| 2 [22]                 | <i>An. dirus s.l.</i> <sup>8</sup> | 83-89 [95]     | No specimen                        | 151 [46]             | <i>An. dirus s.l.</i> <sup>9</sup>                                          |
| 3 [10]                 | <i>An. dirus s.l.</i> <sup>8</sup> | 90 [41,95]     | <i>An. dirus s.l.</i> <sup>8</sup> | 152-155 [95]         | <i>An. dirus s.l.</i> <sup>8</sup>                                          |
| 4-8 [10]               | No specimen                        | 91-93 [95]     | No specimen                        | 156 [95] [58]        | <i>An. dirus s.l.</i> <sup>8</sup>                                          |
| 9 [25]                 | <i>An. dirus s.l.</i> <sup>8</sup> | 94 [95]        | <i>An. dirus s.l.</i> <sup>8</sup> | 156 [36]             | <i>An. baimaii</i> <sup>8</sup>                                             |
| 10 [24]                | <i>An. dirus s.l.</i> <sup>9</sup> | 94-101 [95]    | No specimen                        | 157-159 [16]         | <i>An. nemophilous</i> <sup>7</sup>                                         |
| 11 [54]                | <i>An. dirus s.l.</i> <sup>9</sup> | 101 [95]       | <i>An. dirus s.l.</i> <sup>8</sup> | 160 [4]              | <i>An. crascens</i> <sup>7</sup>                                            |
| 12 [39,59,96]          | <i>An. dirus s.l.</i> <sup>8</sup> | 102-108 [95]   | No specimen                        | 161 [15]             | <i>An. crascens</i> <sup>4,1</sup>                                          |
| 12 [26]                | <i>An. baimaii</i> <sup>1</sup>    | 109 [95]       | <i>An. dirus s.l.</i> <sup>8</sup> | 162 [62]             | <i>An. dirus s.l.</i> <sup>8</sup>                                          |
| 12 [33,93]             | <i>An. baimaii</i> <sup>4</sup>    | 110-111 [95]   | No specimen                        | 163-166 [62]         | No specimen                                                                 |
| 12 [4]                 | <i>An. baimaii</i> <sup>7</sup>    | 112 [26]       | <i>An. baimaii</i> <sup>1</sup>    | 167 [3]              | <i>An. crascens</i> <sup>1</sup>                                            |
| 13 [70]                | <i>An. dirus s.l.</i> <sup>8</sup> | 112 [36,95]    | <i>An. dirus s.l.</i> <sup>8</sup> | 167 [97]             | <i>An. crascens</i> , <i>An. nemophilous</i> <sup>1</sup>                   |
| 14 [98]                | <i>An. dirus s.l.</i> <sup>9</sup> | 112 [57]       | <i>An. baimaii</i> <sup>8</sup>    | 167 [15]             | <i>An. nemophilous</i> <sup>4,1</sup>                                       |
| 15 [44]                | <i>An. dirus s.l.</i> <sup>8</sup> | 113 [95]       | No specimen                        | 167 [16]             | <i>An. nemophilous</i> <sup>7</sup>                                         |
| 16 [84]                | <i>An. dirus s.l.</i> <sup>9</sup> | 113 [41,95]    | <i>An. dirus s.l.</i> <sup>9</sup> | 168 [M]              | No specimen                                                                 |
| 17 [56,60,66,75,79,99] | <i>An. dirus s.l.</i> <sup>9</sup> | 114-115 [95]   | No specimen                        | 169-170 [16]         | <i>An. nemophilous</i> <sup>7</sup>                                         |
| 18 [65,69,100]         | <i>An. dirus s.l.</i> <sup>9</sup> | 115 [41,95]    | <i>An. dirus s.l.</i> <sup>9</sup> | 171 [4]              | <i>An. crascens</i> , <i>An. scanloni</i> <sup>7</sup>                      |
| 19-21 [95]             | No specimen                        | 116 [33,93]    | <i>An. baimaii</i> <sup>4</sup>    | 172 [62]             | <i>An. dirus s.l.</i> <sup>8</sup>                                          |
| 22 [41,95]             | <i>An. dirus s.l.</i> <sup>8</sup> | 117 [95]       | <i>An. dirus s.l.</i> <sup>8</sup> | 173 [3]              | <i>An. crascens</i> , <i>An. scanloni</i> <sup>1</sup>                      |
| 23-24 [95]             | No specimen                        | 118 [95]       | No specimen                        | 174 [62]             | No specimen                                                                 |
| 25-26 [101]            | <i>An. dirus s.l.</i> <sup>9</sup> | 119 [36,58,95] | <i>An. dirus s.l.</i> <sup>8</sup> | 175 [3]              | <i>An. crascens</i> , <i>An. scanloni</i> , <i>An. baimaii</i> <sup>1</sup> |
| 27 [95]                | <i>An. dirus s.l.</i> <sup>8</sup> | 119-120 [95]   | No specimen                        | 175 [4]              | <i>An. baimaii</i> <sup>7</sup>                                             |
| 28 [95]                | No specimen                        | 121 [36,58,95] | <i>An. dirus s.l.</i> <sup>8</sup> | 175 [3]              | <i>An. crascens</i> , <i>An. scanloni</i> <sup>1</sup>                      |
| 29 [41,95]             | <i>An. dirus s.l.</i> <sup>8</sup> | 122 [36,95]    | <i>An. dirus s.l.</i> <sup>8</sup> | 175 [16]             | <i>An. nemophilous</i> <sup>7</sup>                                         |
| 30 [41,95]             | <i>An. dirus s.l.</i> <sup>8</sup> | 123 [36,95]    | <i>An. dirus s.l.</i> <sup>8</sup> | 175 [15]             | <i>An. scanloni</i> <sup>4,1</sup>                                          |
| 30 [95]                | No specimen                        | 124-126 [95]   | No specimen                        | 175 [33,93]          | <i>An. scanloni</i> <sup>4</sup>                                            |
| 31 [95]                | <i>An. dirus s.l.</i> <sup>8</sup> | 127 [37]       | <i>An. scanloni</i> <sup>1</sup>   | 175-176 [16]         | <i>An. nemophilous</i> <sup>7</sup>                                         |
| 31-34 [95]             | No specimen                        | 127 [36,95]    | <i>An. dirus s.l.</i> <sup>8</sup> | 177 [3]              | <i>An. scanloni</i> <sup>1</sup>                                            |
| 35 [95]                | <i>An. dirus s.l.</i> <sup>8</sup> | 127 [102]      | <i>An. dirus s.l.</i> <sup>1</sup> | 178 [3]              | <i>An. crascens</i> , <i>An. baimaii</i> <sup>1</sup>                       |
| 36-37 [95]             | No specimen                        | 128-129 [95]   | No specimen                        | 178 [4]              | <i>An. baimaii</i> <sup>7</sup>                                             |
| 38 [41,95]             | <i>An. dirus s.l.</i> <sup>8</sup> | 130 [95]       | <i>An. dirus s.l.</i> <sup>8</sup> | 179 [4]              | <i>An. crascens</i> , <i>An. baimaii</i> <sup>7</sup>                       |
| 39-40 [95]             | <i>An. dirus s.l.</i> <sup>8</sup> | 131 [95]       | No specimen                        | 180 [16]             | <i>An. nemophilous</i> <sup>7</sup>                                         |
| 41 [95]                | No specimen                        | 132 [95]       | <i>An. dirus s.l.</i> <sup>8</sup> | 180 [4]              | <i>An. baimaii</i> <sup>7</sup>                                             |
| 41 [36,95]             | <i>An. dirus s.l.</i> <sup>8</sup> | 133-136 [95]   | No specimen                        | 181 [3]              | <i>An. crascens</i> , <i>An. baimaii</i> <sup>1</sup>                       |
| 42-44 [95]             | No specimen                        | 137 [36,95]    | <i>An. dirus s.l.</i> <sup>8</sup> | 182 [3]              | <i>An. baimaii</i> <sup>1</sup>                                             |
| 44 [41,95]             | <i>An. dirus s.l.</i> <sup>8</sup> | 138-140 [95]   | No specimen                        | 183 [M]              | No specimen                                                                 |
| 45-48 [95]             | No specimen                        | 141-144 [95]   | <i>An. dirus s.l.</i> <sup>8</sup> | 184-185 [16]         | <i>An. nemophilous</i> <sup>7</sup>                                         |
| 49 [36]                | <i>An. dirus s.s.</i> <sup>9</sup> | 145 [33,93]    | <i>An. baimaii</i> <sup>4</sup>    | 186 [3]              | <i>An. dirus s.s.</i> , <i>An. baimaii</i> <sup>1</sup>                     |
| 49-50 [95]             | <i>An. dirus s.l.</i> <sup>8</sup> | 146 [95]       | No specimen                        | 187 [4]              | <i>An. crascens</i> , <i>An. baimaii</i> <sup>7</sup>                       |
| 50 [41,58,95]          | <i>An. dirus s.l.</i> <sup>8</sup> | 147 [41,95]    | <i>An. dirus s.l.</i> <sup>8</sup> | 188-189 [71,103,104] | <i>An. dirus s.l.</i> <sup>8</sup>                                          |
| 51-62 [95]             | No specimen                        | 148 [45,58,95] | <i>An. dirus s.l.</i> <sup>8</sup> | 190 [71,103,104]     | No specimen                                                                 |
| 62 [41,95]             | <i>An. dirus s.l.</i> <sup>9</sup> | 148 [26]       | <i>An. baimaii</i> <sup>1</sup>    | 191-192 [71,103,104] | <i>An. dirus s.l.</i> <sup>8</sup>                                          |
| 63 [41,95]             | <i>An. dirus s.l.</i> <sup>8</sup> | 148 [37]       | <i>An. dirus s.s.</i> <sup>1</sup> | 192 [3]              | <i>An. dirus s.s.</i> , <i>An. baimaii</i> <sup>1</sup>                     |
| 64 [95]                | <i>An. dirus s.l.</i> <sup>8</sup> | 148 [36]       | <i>An. baimaii</i> <sup>8</sup>    | 193 [15]             | <i>An. dirus s.s.</i> , <i>An. baimaii</i> <sup>4,1</sup>                   |
| 65-78 [95]             | No specimen                        | 148 [102]      | <i>An. dirus s.l.</i> <sup>8</sup> | 193 [33,93]          | <i>An. dirus s.s.</i> , <i>An. baimaii</i> <sup>4</sup>                     |
| 79 [95]                | <i>An. dirus s.l.</i> <sup>8</sup> | 148 [47,105]   | <i>An. dirus s.l.</i> <sup>8</sup> | 194 [4]              | <i>An. scanloni</i> <sup>7</sup>                                            |

Table 1(continued)

| Site[Article] | Species                                                                             | Site[Article]   | Species                                                 | Site[Article] | Species                               |
|---------------|-------------------------------------------------------------------------------------|-----------------|---------------------------------------------------------|---------------|---------------------------------------|
| 195 [4]       | <i>An. baimaii</i> <sup>7</sup>                                                     | 229 [15]        | <i>An. dirus s.s.</i> <sup>4,1</sup>                    | 283 [27]      | No specimen                           |
| 195 [15]      | <i>An. scanloni</i> , <i>An. baimaii</i> ,<br><i>An. nemophilous</i> <sup>4,1</sup> | 229 [33,93]     | <i>An. dirus s.s.</i> <sup>4</sup>                      | 284 [27]      | <i>An. dirus s.l.</i> <sup>8</sup>    |
| 195 [3]       | <i>An. dirus s.s.</i> , <i>An. scanloni</i> ,<br><i>An. baimaii</i> <sup>7</sup>    | 230 [91]        | <i>An. dirus s.l.</i> <sup>8</sup>                      | 284-285 [M]   | <i>An. dirus s.l.</i> <sup>8</sup>    |
| 195 [15]      | <i>An. scanloni</i> , <i>An. baimaii</i> <sup>4,1</sup>                             | 231 [3]         | <i>An. dirus s.s.</i> <sup>1</sup>                      | 285 [27]      | <i>An. dirus s.l.</i> <sup>8</sup>    |
| 195 [33,93]   | <i>An. scanloni</i> , <i>An. baimaii</i> <sup>4</sup>                               | 231 [15]        | <i>An. dirus s.s.</i> <sup>4,1</sup>                    | 286 [27,106]  | No specimen                           |
| 195 [15]      | <i>An. scanloni</i> , <i>An. baimaii</i> <sup>4,1</sup>                             | 231[33,93]      | <i>An. dirus s.s.</i> <sup>4</sup>                      | 287 [107]     | <i>An. dirus s.l.</i> <sup>8</sup>    |
| 195 [16]      | <i>An. nemophilous</i> <sup>7</sup>                                                 | 232 [108]       | No specimen                                             | 288-289 [28]  | No specimen                           |
| 195 [4]       | <i>An. scanloni</i> <sup>7</sup>                                                    | 233 [3]         | <i>An. dirus s.s.</i> <sup>1</sup>                      | 290-291 [M]   | No specimen                           |
| 195 [M]       | <i>An. dirus s.l.</i> <sup>8</sup>                                                  | 234 [16]        | <i>An. nemophilous</i> <sup>7</sup>                     | 292 [29,53]   | <i>An. dirus s.s.</i> <sup>6</sup>    |
| 196-197 [4]   | <i>An. scanloni</i> <sup>7</sup>                                                    | 235 [43]        | <i>An. dirus s.s.</i> <sup>7</sup>                      | 292 [28]      | No specimen                           |
| 198 [15]      | <i>An. baimaii</i> <sup>4,1</sup>                                                   | 236 [109]       | <i>An. dirus s.l.</i> <sup>9</sup>                      | 292 [M]       | <i>An. dirus s.l.</i> <sup>8</sup>    |
| 199 [4]       | <i>An. baimaii</i> <sup>7</sup>                                                     | 237 [M]         | No specimen                                             | 293 [M]       | No specimen                           |
| 200 [3]       | <i>An. dirus s.s.</i> <sup>1</sup>                                                  | 238-239 [16]    | <i>An. nemophilous</i> <sup>7</sup>                     | 294 [28]      | <i>An. dirus s.l.</i> <sup>8</sup>    |
| 201 [3]       | <i>An. dirus s.s.</i> , <i>An. baimaii</i> <sup>7</sup>                             | 240 [3]         | <i>An. dirus s.s.</i> <sup>1</sup>                      | 295-296 [M]   | <i>An. dirus s.l.</i> <sup>8</sup>    |
| 202 [3]       | <i>An. dirus s.s.</i> , <i>An. baimaii</i> <sup>7</sup>                             | 240 [M]         | <i>An. dirus s.l.</i> <sup>8</sup>                      | 297 [28]      | <i>An. dirus s.l.</i> <sup>8</sup>    |
| 203 [15]      | <i>An. dirus s.s.</i> , <i>An. baimaii</i> <sup>4,1</sup>                           | 241 [34]        | <i>An. dirus s.s.</i> , <i>An. baimaii</i> <sup>7</sup> | 298-300 [M]   | No specimen                           |
| 203 [33,93]   | <i>An. dirus s.s.</i> , <i>An. baimaii</i> <sup>4</sup>                             | 241 [68,81,110] | <i>An. dirus s.l.</i> <sup>8</sup>                      | 301 [74]      | <i>An. dirus s.l.</i> <sup>9</sup>    |
| 204 [4]       | <i>An. baimaii</i> <sup>7</sup>                                                     | 242 [M]         | <i>An. dirus s.l.</i> <sup>8</sup>                      | 302 [30]      | <i>An. baimaii</i> <sup>7</sup>       |
| 204 [49]      | <i>An. dirus s.l.</i> <sup>8</sup>                                                  | 243 [42,51,77]  | <i>An. dirus s.l.</i> <sup>8</sup>                      | 302 [89]      | <i>An. dirus s.l.</i> <sup>9</sup>    |
| 204 [3]       | <i>An. dirus s.s.</i> <sup>1</sup>                                                  | 244 [15]        | <i>An. dirus s.s.</i> <sup>4,1</sup>                    | 303-318 [M]   | No specimen                           |
| 204 [26]      | <i>An. dirus s.s.</i> , <i>An. baimaii</i> <sup>7</sup>                             | 244 [33,93]     | <i>An. dirus s.s.</i> <sup>4</sup>                      | 319 [29,53]   | No specimen                           |
| 204 [5]       | <i>An. dirus s.s.</i> , <i>An. baimaii</i> <sup>2,3</sup>                           | 245 [16]        | <i>An. nemophilous</i> <sup>7</sup>                     | 319-326 [M]   | No specimen                           |
| 205 [16]      | <i>An. nemophilous</i> <sup>7</sup>                                                 | 246-249 [38]    | No specimen                                             | 327 [M]       | <i>An. dirus s.s.</i> <sup>4</sup>    |
| 206 [26]      | <i>An. dirus s.s.</i> , <i>An. baimaii</i> <sup>7</sup>                             | 250 [38]        | <i>An. dirus s.l.</i> <sup>8</sup>                      | 328 [M]       | <i>An. dirus s.l.</i> <sup>8</sup>    |
| 206 [15]      | <i>An. dirus s.s.</i> <sup>4,1</sup>                                                | 251 [M]         | <i>An. dirus s.l.</i> <sup>8</sup>                      | 329-330 [M]   | No specimen                           |
| 207 [111]     | <i>An. dirus s.l.</i> <sup>8</sup>                                                  | 252 [38]        | <i>An. dirus s.l.</i> <sup>8</sup>                      | 331-335 [M]   | <i>An. dirus s.s.</i> <sup>4</sup>    |
| 207-208 [4]   | <i>An. baimaii</i> <sup>7</sup>                                                     | 253 [M]         | No specimen                                             | 336 [112]     | <i>An. dirus s.l.</i> <sup>8</sup>    |
| 209 [113]     | <i>An. dirus s.l.</i> <sup>9</sup>                                                  | 254-256 [M]     | <i>An. dirus s.s.</i> <sup>4</sup>                      | 336 [29,53]   | <i>An. dirus s.s.</i> <sup>6</sup>    |
| 209 [61]      | <i>An. dirus s.l.</i> <sup>9</sup>                                                  | 257 [35]        | <i>An. dirus s.l.</i> <sup>8</sup>                      | 337 [M]       | <i>An. dirus s.s.</i> <sup>4</sup>    |
| 209 [114]     | <i>An. dirus s.l.</i> <sup>9</sup>                                                  | 258 [M]         | <i>An. dirus s.l.</i> <sup>8</sup>                      | 338 [M]       | No specimen                           |
| 210 [3]       | <i>An. dirus s.s.</i> , <i>An. baimaii</i> <sup>7</sup>                             | 259-263 [M]     | <i>An. dirus s.s.</i> <sup>4</sup>                      | 339 [M]       | <i>An. dirus s.l.</i> <sup>8</sup>    |
| 210 [4]       | <i>An. baimaii</i> <sup>7</sup>                                                     | 264 [55]        | <i>An. dirus s.l.</i> <sup>8</sup>                      | 340-341 [M]   | <i>An. dirus s.s.</i> <sup>4</sup>    |
| 211-213 [115] | No specimen                                                                         | 265 [M]         | <i>An. dirus s.l.</i> <sup>8</sup>                      | 341 [M]       | <i>An. dirus s.l.</i> <sup>8</sup>    |
| 213 [3]       | <i>An. dirus s.s.</i> , <i>An. baimaii</i> <sup>7</sup>                             | 266 [M]         | No specimen                                             | 342-343 [M]   | No specimen                           |
| 214 [115]     | No specimen                                                                         | 267 [29,53]     | <i>An. dirus s.s.</i> <sup>6</sup>                      | 344-345 [M]   | <i>An. dirus s.s.</i> <sup>4</sup>    |
| 215 [116]     | <i>An. dirus s.l.</i> <sup>9</sup>                                                  | 267 [M]         | <i>An. dirus s.l.</i> <sup>8</sup>                      | 346 [29,53]   | <i>An. dirus s.s.</i> <sup>6</sup>    |
| 216 [115]     | No specimen                                                                         | 268 [M]         | <i>An. dirus s.s.</i> <sup>4</sup>                      | 346 [M]       | <i>An. dirus s.l.</i> <sup>8</sup>    |
| 217 [63]      | <i>An. dirus s.l.</i> <sup>9</sup>                                                  | 269-271 [117]   | <i>An. dirus s.l.</i> <sup>8</sup>                      | 347-361 [M]   | No specimen                           |
| 218 [M]       | <i>An. dirus s.l.</i> <sup>8</sup>                                                  | 272 [M]         | <i>An. dirus s.l.</i> <sup>8</sup>                      | 362 [29,53]   | No specimen                           |
| 219-221 [3]   | <i>An. dirus s.s.</i> <sup>1</sup>                                                  | 273 [28]        | <i>An. dirus s.l.</i> <sup>8</sup>                      | 362-363 [M]   | No specimen                           |
| 222 [15]      | <i>An. dirus s.s.</i> <sup>4,1</sup>                                                | 274 [M]         | No specimen                                             | 364 [73]      | <i>An. dirus s.l.</i> <sup>9</sup>    |
| 223 [3]       | <i>An. dirus s.s.</i> , <i>An. baimaii</i> <sup>7</sup>                             | 275-276 [M]     | <i>An. dirus s.l.</i> <sup>8</sup>                      | 365-366 [74]  | <i>An. dirus s.l.</i> <sup>9</sup>    |
| 224 [3]       | <i>An. dirus s.s.</i> <sup>1</sup>                                                  | 276 [64]        | <i>An. dirus s.l.</i> <sup>8</sup>                      | 367 [118]     | <i>An. dirus s.l.</i> <sup>9</sup>    |
| 224 [33,93]   | <i>An. dirus s.s.</i> <sup>4</sup>                                                  | 277 [28]        | <i>An. dirus s.l.</i> <sup>8</sup>                      | 368 [30]      | <i>An. dirus s.s.</i> <sup>5</sup>    |
| 224 [15]      | <i>An. dirus s.s.</i> <sup>4,1</sup>                                                | 278-279 [28]    | No specimen                                             | 369 [119]     | <i>An. dirus s.l.</i> <sup>9</sup>    |
| 225-227 [3]   | <i>An. dirus s.s.</i> <sup>1</sup>                                                  | 280 [28]        | <i>An. dirus s.l.</i> <sup>8</sup>                      | 370 [32]      | <i>An. takasagoensis</i> <sup>8</sup> |
| 228 [M]       | <i>An. dirus s.l.</i> <sup>8</sup>                                                  | 281 [M]         | <i>An. dirus s.l.</i> <sup>8</sup>                      |               |                                       |
| 229 [3]       | <i>An. dirus s.s.</i> <sup>1</sup>                                                  | 282 [27]        | <i>An. dirus s.l.</i> <sup>8</sup>                      |               |                                       |

The Map key links the map and the reviewed publications and allows the reader to identify the correspondence between each collection site (Site) and the reviewed publications [Reference] in which the site was reported, including the sites collected by the MALVECASIA project [M]. Sibling species status as well as identification method are presented for the reader to evaluate the degree of confidence associated with each method, i.e. 1: polytene chromosomal banding patterns[17] , 2: DNA probes [19],3: enzyme electromorph [18], 4: ASPCR [15], 5: rDNA ITS2, 6: random amplified polymorphic DNA (RAPD) [20], 6: Taxonomic, 7: Morphologic, 8: Unknown. More details are available in the other additional files associated with this article.
